**CORRECTION**

# Intracapsular algae provide fixed carbon to developing embryos of the salamander *Ambystoma maculatum*

Erin R. Graham, Scott A. Fay, Adam Davey and Robert W. Sanders

There was an error published in *J. Exp. Biol.* **216**, 452-459. The calculations of carbon fixation and translocation rates, which are presented in supplementary material Table S2, were incorrect. The error was not in the measured data (disintegrations per minute of radioactive samples), but a mathematical error that occurred when calculating the amount of carbon in the sample incubations. Thus, the error does not affect the percent carbon translocation values, only the calculated rates of carbon fixation and translocation per hour.

In Results, Carbon translocation (p. 455, lines 8–10), the text should read:

The average hourly rate of carbon fixation was  $589.1 \pm 56.7$  ng carbon per sample, or 294.5 ng carbon per egg. An estimated average 15.4 ng fixed carbon was translocated to each egg per hour.

The correct version of Table S2 appears below:

**Table S2. Data from carbon translocation experiments using [ $^{14}\text{C}$ ]bicarbonate**

| Sample | Net DPM whole egg <sup>a</sup> | Net DPM embryo <sup>b</sup> | Percent carbon translocation egg <sup>-1</sup> <sup>c</sup> | Rate of carbon fixation (ng C h <sup>-1</sup> egg <sup>-1</sup> ) <sup>d</sup> | Rate of carbon translocation (ng C h <sup>-1</sup> egg <sup>-1</sup> ) <sup>e</sup> |
|--------|--------------------------------|-----------------------------|-------------------------------------------------------------|--------------------------------------------------------------------------------|-------------------------------------------------------------------------------------|
| 1      | 9634.3                         | 877.1                       | 9.1                                                         | 235.7                                                                          | 21.5                                                                                |
| 2      | 12485.4                        | 1644.5                      | 13.2                                                        | 305.4                                                                          | 40.2                                                                                |
| 3f     | 4199.4                         | 1247.3                      | 29.7                                                        | 102.7                                                                          | 30.5                                                                                |
| 4      | 20278.7                        | 96.2                        | 0.5                                                         | 496.0                                                                          | 2.4                                                                                 |
| 5      | 13234.3                        | 992.6                       | 7.5                                                         | 323.7                                                                          | 24.3                                                                                |
| 6      | 5920.2                         | 445.7                       | 7.5                                                         | 144.8                                                                          | 10.9                                                                                |
| 7      | 10335.4                        | 577.1                       | 5.6                                                         | 252.8                                                                          | 14.1                                                                                |
| 8      | 28224.7                        | 654.1                       | 2.3                                                         | 690.4                                                                          | 16.0                                                                                |
| 9      | 5783.7                         | 643.4                       | 11.1                                                        | 141.5                                                                          | 15.7                                                                                |
| 10     | 10515.7                        | 100.1                       | 1.0                                                         | 257.2                                                                          | 2.5                                                                                 |
| 11     | 4000.6                         | 247.9                       | 6.2                                                         | 97.9                                                                           | 6.1                                                                                 |
| Mean   | 12041.3                        | 627.9                       | 6.4%                                                        | 294.5                                                                          | 15.4                                                                                |

Samples consist of two eggs combined in one vial. DPM = disintegrations per minute.

<sup>a</sup>DPM of egg (including embryo) incubated in light minus average DPM of egg samples ( $n=5$ ) incubated in darkness.

<sup>b</sup>DPM of embryo only incubated in light minus average DPM of embryos ( $n=5$ ) incubated in darkness.

<sup>c</sup>Net DPM of embryo/net DPM of whole egg  $\times$  100.

<sup>d</sup>Carbon fixation per hour = dissolved inorganic carbon (DIC) in sample  $\times$  (DPM total egg/DPM of  $^{14}\text{C}$  added/hours incubation). DIC was estimated according to Wetzel and Likens (2000).

<sup>e</sup>Carbon fixation (or translocation) per hour = DIC in sample  $\times$  [DPM total egg (or embryo fraction)/DPM of  $^{14}\text{C}$  added/hours incubation]. DIC was estimated according to Wetzel and Likens (2000).

<sup>f</sup>Sample not included in mean calculations.

The authors sincerely apologise for the errors in the original manuscript, but assure readers that they do not affect any of the major findings or conclusions of the work.
